# Supplementary material for: Optimization of Upper Extremity Rehabilitation by Combining Telerehabilitation With an Exergame in People With Chronic Stroke: Protocol for a Mixed Methods Study
Source: PubMed Central journal article supplement (PMC7273231; doi:10.2196/14629), 2020-05-21
Supplement: resprot_v9i5e14629_app1.pdf [file resprot_v9i5e14629_app1.pdf]

| Themes                                         | Main codes                              | Explanation of main codes                                                                                                                                                                               |                                                                                                                                                                                                                        |
|------------------------------------------------|-----------------------------------------|---------------------------------------------------------------------------------------------------------------------------------------------------------------------------------------------------------|------------------------------------------------------------------------------------------------------------------------------------------------------------------------------------------------------------------------|
|                                                |                                         | Participant                                                                                                                                                                                             | Therapist                                                                                                                                                                                                              |
| <b>Experience with VirTele exergame system</b> | Performance                             | <p>Of the affected upper extremity</p> <ul style="list-style-type: none"> <li>• perceived change in arm functional performance / impact on activities of daily life compared to expectations</li> </ul> | <ul style="list-style-type: none"> <li>• quality of interactions with technology</li> <li>• services rendered</li> <li>• compatibility with needs / expectations</li> <li>• obstacles or technical problems</li> </ul> |
|                                                |                                         | <p>Of the technology</p> <ul style="list-style-type: none"> <li>• expected benefits</li> <li>• compatibility with needs / expectations</li> <li>• obstacles or technical problems</li> </ul>            |                                                                                                                                                                                                                        |
|                                                | Effort                                  | <ul style="list-style-type: none"> <li>• apprehensions</li> <li>• expected ease of use/ actual effort required to use the technology</li> <li>• compatibility with needs / expectations</li> </ul>      |                                                                                                                                                                                                                        |
|                                                | Facilitating conditions                 | <ul style="list-style-type: none"> <li>• attitude towards the use of technology</li> <li>• resources put in place</li> <li>• ease with technology</li> </ul>                                            |                                                                                                                                                                                                                        |
| <b>Empowerment of the participant</b>          | Participation in shared decision-making | <ul style="list-style-type: none"> <li>• role during the consultation</li> <li>• experience with the guidance provided</li> <li>• goals fixed / patterns of achievement</li> </ul>                      | <ul style="list-style-type: none"> <li>• responsibilities and role during the intervention</li> </ul>                                                                                                                  |

Management of care

- management of the consultations and games sessions
- resources put in place/ support
- comparison with previous rehabilitation experience

- the logic behind the choice of games, the adjustment of the difficulty level, number of repetitions and any other parameters

Participant states and capacities

- perceived personal control over health and healthcare
- perceived general health condition after the end of the program
- perceived motivation and autonomy support

- transfer into activities of daily living
- strategies used to support participant autonomy
